# Supplementary material for: The Toxicity of Salicylhydroxamic Acid and Its Effect on the Sensitivity of Ustilaginoidea virens to Azoxystrobin and Pyraclostrobin
Source: MDPI journal article supplement (doi:10.3390/jof8111231), 2022-11-21
Supplement: s1 [file s1]

**Table S1.** Effects of SHAM at 10 µg/mL on EC<sub>50</sub> values of azoxystrobin against mycelial growth of *U. virens* on potato sucrose agar (PSA) and minimal medium (MM).

| Isolate              | EC <sub>50</sub> (µg/mL) on PSA |           | Fold change | EC <sub>50</sub> (µg/mL) on MM |           | Fold change |
|----------------------|---------------------------------|-----------|-------------|--------------------------------|-----------|-------------|
|                      | Without SHAM                    | With SHAM |             | Without SHAM                   | With SHAM |             |
| GL18                 | 0.027                           | 0.033     | 0.82        | 0.124                          | 0.084     | 1.48        |
| GY20                 | 0.089                           | 0.053     | 1.68        | 0.120                          | 0.009     | 13.33       |
| HWD                  | 0.251                           | 0.148     | 1.70        | 0.198                          | 0.039     | 5.08        |
| JR4                  | 0.074                           | 0.083     | 0.89        | 0.128                          | 0.008     | 16.97       |
| JS28                 | 0.291                           | 0.189     | 1.54        | 0.154                          | 0.015     | 10.27       |
| JS60                 | 0.129                           | 0.117     | 1.10        | 0.056                          | 0.020     | 2.80        |
| YD2                  | 0.279                           | 0.108     | 2.58        | 0.141                          | 0.042     | 3.33        |
| YZ10                 | 0.126                           | 0.096     | 1.31        | 0.119                          | 0.015     | 8.01        |
| ZJ4                  | 0.233                           | 0.063     | 3.70        | 0.294                          | 0.035     | 8.34        |
| ZJ26                 | 0.051                           | 0.042     | 1.21        | 0.019                          | 0.009     | 2.06        |
| Average              | 0.155                           | 0.093     | 1.67        | 0.135                          | 0.028     | 4.82        |
| Paired <i>t</i> test | <i>P</i> = 0.020                |           |             | <i>P</i> < 0.001               |           |             |

**Table S2.** Effects of SHAM at 10 µg/mL on EC<sub>50</sub> values of pyraclostrobin against mycelial growth of *U. virens* on potato sucrose agar (PSA) and minimal medium (MM).

| Isolate              | EC <sub>50</sub> (µg/mL) on PSA |           | Fold change | EC <sub>50</sub> (µg/mL) on MM |           | Fold change |
|----------------------|---------------------------------|-----------|-------------|--------------------------------|-----------|-------------|
|                      | Without SHAM                    | With SHAM |             | Without SHAM                   | With SHAM |             |
| GL18                 | 0.092                           | 0.013     | 7.08        | 0.108                          | 0.015     | 7.20        |
| GY20                 | 0.084                           | 0.052     | 1.62        | 0.038                          | 0.035     | 1.09        |
| HWD                  | 0.046                           | 0.031     | 1.48        | 0.081                          | 0.019     | 4.26        |
| JR4                  | 0.099                           | 0.014     | 7.07        | 0.048                          | 0.006     | 8.00        |
| JS28                 | 0.025                           | 0.018     | 1.39        | 0.056                          | 0.007     | 8.00        |
| JS60                 | 0.033                           | 0.018     | 1.83        | 0.039                          | 0.012     | 3.25        |
| YD2                  | 0.118                           | 0.032     | 3.69        | 0.112                          | 0.009     | 12.44       |
| YZ10                 | 0.063                           | 0.022     | 2.86        | 0.088                          | 0.007     | 12.57       |
| ZJ4                  | 0.083                           | 0.007     | 11.86       | 0.078                          | 0.009     | 8.67        |
| ZJ26                 | 0.058                           | 0.042     | 1.38        | 0.123                          | 0.045     | 2.73        |
| Average              | 0.070                           | 0.025     | 2.80        | 0.077                          | 0.016     | 4.81        |
| Paired <i>t</i> test | <i>P</i> < 0.001                |           |             | <i>P</i> < 0.001               |           |             |
